# Supplementary material for: Exploring the Accessory Genome of Multidrug-Resistant Rhodococcus equi Clone 2287
Source: MDPI journal article supplement (doi:10.3390/antibiotics12111631), 2023-11-17
Supplement: s1 [file s1]

## *Supplementary Material*

**Table S1. Genomes of the 72 *R. equi* clinical isolates used in this study**

| Isolate   | Sample Type | Year of Isolation | Genogroup   | Macrolide-resistance mechanism | Accession no. | Reference |
|-----------|-------------|-------------------|-------------|--------------------------------|---------------|-----------|
| CL_mdr146 | Clinical    | 2017              | Clone 2287  | <i>erm</i> (46)                | SAMN13392179  | [32]      |
| CL_mdr147 | Clinical    | 2017              | Clone 2287  | <i>erm</i> (46)                | SAMN13392180  | [32]      |
| CL_mdr148 | Clinical    | 2017              | Clone 2287  | <i>erm</i> (46)                | SAMN13392181  | [32]      |
| CL_mdr152 | Clinical    | 2017              | Clone 2287  | <i>erm</i> (46)                | SAMN13392185  | [32]      |
| CL_mdr155 | Clinical    | 2017              | Clone G2016 | <i>erm</i> (46)                | SAMN13392188  | [32]      |
| CL_mdr156 | Clinical    | 2017              | Clone 2287  | <i>erm</i> (46)                | SAMN13392189  | [32]      |
| CL_mdr160 | Clinical    | 2012              | Clone 2287  | <i>erm</i> (46)                | SAMN13392193  | [32]      |
| CL_mdr161 | Clinical    | 2013              | Clone 2287  | <i>erm</i> (46)                | SAMN13392194  | [32]      |
| CL_mdr162 | Clinical    | 2014              | Clone 2287  | <i>erm</i> (46)                | SAMN13392195  | [32]      |
| CL_mdr163 | Clinical    | 2014              | Clone 2287  | <i>erm</i> (46)                | SAMN13392196  | [32]      |
| CL_mdr164 | Clinical    | 2015              | Clone 2287  | <i>erm</i> (46)                | SAMN13392197  | [32]      |
| CL_mdr165 | Clinical    | 2017              | Clone 2287  | <i>erm</i> (46)                | SAMN13392198  | [32]      |
| CL_mdr168 | Clinical    | 2015              | Clone 2287  | <i>erm</i> (46)                | SAMN13392201  | [32]      |
| CL_mdr169 | Clinical    | 2015              | Clone 2287  | <i>erm</i> (46)                | SAMN13392202  | [32]      |
| CL_mdr170 | Clinical    | 2015              | Clone 2287  | <i>erm</i> (46)                | SAMN13392203  | [32]      |
| CL_mdr171 | Clinical    | 2015              | Clone 2287  | <i>erm</i> (46)                | SAMN13392204  | [32]      |
| CL_mdr172 | Clinical    | 2015              | Clone 2287  | <i>erm</i> (46)                | SAMN13392205  | [32]      |
| CL_mdr173 | Clinical    | 2015              | Clone 2287  | <i>erm</i> (46)                | SAMN13392206  | [32]      |
| CL_mdr174 | Clinical    | 2015              | Clone 2287  | <i>erm</i> (46)                | SAMN13392207  | [32]      |
| CL_mdr176 | Clinical    | 2017              | Clone 2287  | <i>erm</i> (46)                | SAMN13392209  | [32]      |
| CL_mdr178 | Clinical    | 2015              | Clone 2287  | <i>erm</i> (46)                | SAMN13392211  | [32]      |
| CL_mdr180 | Clinical    | 2015              | Clone 2287  | <i>erm</i> (46)                | SAMN13392213  | [32]      |
| CL_mdr181 | Clinical    | 2016              | Clone 2287  | <i>erm</i> (46)                | SAMN13392214  | [32]      |
| CL_mdr183 | Clinical    | 2016              | Clone G2016 | <i>erm</i> (46)                | SAMN13392216  | [32]      |
| CL_mdr184 | Clinical    | 2016              | Clone 2287  | <i>erm</i> (46)                | SAMN13392217  | [32]      |
| CL_mdr185 | Clinical    | 2016              | Singleton   | <i>erm</i> (46)                | SAMN13392218  | [32]      |
| CL_mdr187 | Clinical    | 2016              | Singleton   | <i>erm</i> (46)                | SAMN13392220  | [32]      |
| CL_mdr188 | Clinical    | 2017              | Singleton   | <i>erm</i> (46)                | SAMN13392221  | [32]      |
| CL_mdr189 | Clinical    | 2017              | Singleton   | <i>erm</i> (46)                | SAMN13392222  | [32]      |
| CL_mdr191 | Clinical    | 2017              | Singleton   | <i>erm</i> (46)                | SAMN13392224  | [32]      |
| CL_mdr192 | Clinical    | 2017              | Singleton   | <i>erm</i> (46)                | SAMN13392225  | [32]      |
| CL_mdr194 | Clinical    | 2017              | Singleton   | <i>erm</i> (46)                | SAMN13392227  | [32]      |
| CL_s145   | Clinical    | 2017              | Singleton   | Susceptible                    | SAMN13392178  | [32]      |
| CL_s149   | Clinical    | 2017              | Singleton   | Susceptible                    | SAMN13392182  | [32]      |
| CL_s150   | Clinical    | 2017              | Singleton   | Susceptible                    | SAMN13392183  | [32]      |
| CL_s151   | Clinical    | 2017              | Singleton   | Susceptible                    | SAMN13392184  | [32]      |
| CL_s153   | Clinical    | 2017              | Singleton   | Susceptible                    | SAMN13392186  | [32]      |
| CL_s154   | Clinical    | 2017              | Singleton   | Susceptible                    | SAMN13392187  | [32]      |
| CL_s157   | Clinical    | 2017              | Singleton   | Susceptible                    | SAMN13392190  | [32]      |
| CL_s158   | Clinical    | 2017              | Singleton   | Susceptible                    | SAMN13392191  | [32]      |
| CL_s159   | Clinical    | 2012              | Singleton   | Susceptible                    | SAMN13392192  | [32]      |
| CL_s166   | Clinical    | 2015              | Singleton   | Susceptible                    | SAMN13392199  | [32]      |
| CL_s167   | Clinical    | 2015              | Singleton   | Susceptible                    | SAMN13392200  | [32]      |
| CL_s175   | Clinical    | 2015              | Singleton   | Susceptible                    | SAMN13392208  | [32]      |
| CL_s177   | Clinical    | 2015              | Singleton   | Susceptible                    | SAMN13392210  | [32]      |
| CL_s179   | Clinical    | 2015              | Singleton   | Susceptible                    | SAMN13392212  | [32]      |
| CL_s182   | Clinical    | 2016              | Singleton   | Susceptible                    | SAMN13392215  | [32]      |
| CL_s186   | Clinical    | 2016              | Singleton   | Susceptible                    | SAMN13392219  | [32]      |
| CL_s190   | Clinical    | 2017              | Singleton   | Susceptible                    | SAMN13392223  | [32]      |

|            |              |      |            |                 |              |      |
|------------|--------------|------|------------|-----------------|--------------|------|
| CL_s193    | Clinical     | 2017 | Singleton  | Susceptible     | SAMN13392226 | [32] |
| PAM 2282   | Clinical     | 2011 | Clone 2287 | <i>erm</i> (46) | LWTT00000000 | [35] |
| PAM 2289   | Clinical     | 2010 | Clone 2287 | <i>erm</i> (46) | MUXK00000000 | [35] |
| PAM 2291   | Clinical     | 2010 | Clone 2287 | <i>erm</i> (46) | MVDS00000000 | [35] |
| PAM 2292   | Clinical     | 2010 | Clone 2287 | <i>erm</i> (46) | MVDT00000000 | [35] |
| PAM 2293   | Clinical     | 2011 | Clone 2287 | <i>erm</i> (46) | MVDU00000000 | [35] |
| PAM 2294   | Clinical     | 2011 | Clone 2287 | <i>erm</i> (46) | MVDV00000000 | [35] |
| PAM 2295   | Clinical     | 2011 | Clone 2287 | <i>erm</i> (46) | MVDQ00000000 | [35] |
| PAM 2296   | Clinical     | 2011 | Clone 2287 | <i>erm</i> (46) | MVDR00000000 | [35] |
| PAM 2297   | Clinical     | 2002 | Clone 2287 | <i>erm</i> (46) | MUXJ00000000 | [35] |
| PAM2274    | Clinical     | 2011 | Singleton  | Susceptible     | LWTQ00000000 | [35] |
| PAM2275    | Clinical     | 2003 | Clone 2287 | <i>erm</i> (46) | MULU00000000 | [35] |
| PAM2276    | Clinical     | 2001 | Singleton  | Susceptible     | LWTR00000000 | [35] |
| PAM2277    | Clinical     | 2004 | Clone 2287 | <i>erm</i> (46) | MUMB00000000 | [35] |
| PAM2278    | Clinical     | 2002 | Singleton  | Susceptible     | MUMA00000000 | [35] |
| PAM2279    | Clinical     | 2001 | Singleton  | Susceptible     | LWTS00000000 | [35] |
| PAM2280    | Clinical     | 2009 | Clone 2287 | <i>erm</i> (46) | MULW00000000 | [35] |
| PAM2281    | Clinical     | 2005 | Clone 2287 | <i>erm</i> (46) | MULT00000000 | [35] |
| PAM2283    | Clinical     | 2002 | Clone 2287 | <i>erm</i> (46) | MULY00000000 | [35] |
| PAM2284    | Clinical     | 2005 | Clone 2287 | <i>erm</i> (46) | MULZ00000000 | [35] |
| PAM2285    | Clinical     | 2005 | Clone 2287 | <i>erm</i> (46) | LWTU00000000 | [35] |
| PAM2286    | Clinical     | 2005 | Clone 2287 | <i>erm</i> (46) | MULX00000000 | [35] |
| PAM2287    | Clinical     | 2010 | Clone 2287 | <i>erm</i> (46) | LWTV00000000 | [35] |
| ENV_mdr_1  | Environmetal | 2017 | Clone 2287 | <i>erm</i> (46) | WVDI00000000 | [33] |
| ENV_mdr_8  | Environmetal | 2017 | Clone 2287 | <i>erm</i> (46) | WVDG00000000 | [33] |
| ENV_mdr_9  | Environmetal | 2017 | Clone 2287 | <i>erm</i> (46) | WVEL00000000 | [33] |
| ENV_mdr_10 | Environmetal | 2017 | Clone 2287 | <i>erm</i> (46) | WVDF00000000 | [33] |
| ENV_mdr_12 | Environmetal | 2017 | Clone 2287 | <i>erm</i> (46) | WVDE00000000 | [33] |
| ENV_mdr_14 | Environmetal | 2017 | Clone 2287 | <i>erm</i> (46) | WVDD00000000 | [33] |
| ENV_mdr_16 | Environmetal | 2017 | Clone 2287 | <i>erm</i> (46) | WVDC00000000 | [33] |
| ENV_mdr_18 | Environmetal | 2017 | Clone 2287 | <i>erm</i> (46) | WVDB00000000 | [33] |
| ENV_mdr_20 | Environmetal | 2017 | Clone 2287 | <i>erm</i> (46) | WVEK00000000 | [33] |
| ENV_mdr_22 | Environmetal | 2017 | Clone 2287 | <i>erm</i> (46) | WVDA00000000 | [33] |
| ENV_s_23   | Environmetal | 2017 | Clone 2287 | <i>erm</i> (46) | WVAF00000000 | [33] |
| ENV_mdr_24 | Environmetal | 2017 | Clone 2287 | <i>erm</i> (46) | WVCZ00000000 | [33] |
| ENV_mdr_26 | Environmetal | 2017 | Clone 2287 | <i>erm</i> (46) | WVCY00000000 | [33] |
| ENV_mdr_28 | Environmetal | 2017 | Clone 2287 | <i>erm</i> (46) | WVCX00000000 | [33] |
| ENV_mdr_30 | Environmetal | 2017 | Clone 2287 | <i>erm</i> (46) | WVCW00000000 | [33] |
| ENV_mdr_32 | Environmetal | 2017 | Clone 2287 | <i>erm</i> (46) | WVEJ00000000 | [33] |
| ENV_mdr_36 | Environmetal | 2017 | Clone 2287 | <i>erm</i> (46) | WVCU00000000 | [33] |
| ENV_mdr_40 | Environmetal | 2017 | Clone 2287 | <i>erm</i> (46) | WVCT00000000 | [33] |
| ENV_mdr_55 | Environmetal | 2017 | Clone 2287 | <i>erm</i> (46) | WVCL00000000 | [33] |
| ENV_mdr_58 | Environmetal | 2017 | Clone 2287 | <i>erm</i> (46) | WVCJ00000000 | [33] |
| ENV_mdr_61 | Environmetal | 2017 | Clone 2287 | <i>erm</i> (46) | WVCH00000000 | [33] |
| ENV_mdr_64 | Environmetal | 2017 | Clone 2287 | <i>erm</i> (46) | WVCF00000000 | [33] |
| ENV_mdr_67 | Environmetal | 2017 | Clone 2287 | <i>erm</i> (46) | WVCD00000000 | [33] |
| ENV_mdr_70 | Environmetal | 2017 | Clone 2287 | <i>erm</i> (46) | WVEG00000000 | [33] |
| ENV_mdr_73 | Environmetal | 2017 | Clone 2287 | <i>erm</i> (46) | WVCA00000000 | [33] |
| ENV_mdr_79 | Environmetal | 2017 | Clone 2287 | <i>erm</i> (46) | WVBX00000000 | [33] |

|             |              |      |             |                                      |              |      |
|-------------|--------------|------|-------------|--------------------------------------|--------------|------|
| ENV_mdr_82  | Environmetal | 2017 | Clone 2287  | <i>erm</i> (46)                      | WVBV00000000 | [33] |
| ENV_mdr_85  | Environmetal | 2017 | Clone 2287  | <i>erm</i> (46)                      | WVBT00000000 | [33] |
| ENV_mdr_88  | Environmetal | 2017 | Clone 2287  | <i>erm</i> (46)                      | WVBR00000000 | [33] |
| ENV_mdr_91  | Environmetal | 2017 | Clone 2287  | <i>erm</i> (46)                      | WVBP00000000 | [33] |
| ENV_mdr_94  | Environmetal | 2017 | Clone 2287  | <i>erm</i> (46)                      | WVBN00000000 | [33] |
| ENV_mdr_97  | Environmetal | 2017 | Clone 2287  | <i>erm</i> (46)                      | WVEE00000000 | [33] |
| ENV_mdr_100 | Environmetal | 2017 | Clone 2287  | <i>erm</i> (46)                      | WVED00000000 | [33] |
| ENV_mdr_106 | Environmetal | 2017 | Clone 2287  | <i>erm</i> (46)                      | WVBI00000000 | [33] |
| ENV_mdr_109 | Environmetal | 2017 | Clone 2287  | <i>erm</i> (46)                      | WVBG00000000 | [33] |
| ENV_mdr_112 | Environmetal | 2017 | Clone 2287  | <i>erm</i> (46)                      | WVBE00000000 | [33] |
| ENV_mdr_115 | Environmetal | 2017 | Clone 2287  | <i>erm</i> (46)                      | WVBD00000000 | [33] |
| ENV_mdr_118 | Environmetal | 2017 | Clone 2287  | <i>erm</i> (46)                      | WVBB00000000 | [33] |
| ENV_mdr_124 | Environmetal | 2017 | Clone 2287  | <i>erm</i> (46)                      | WVAY00000000 | [33] |
| ENV_mdr_127 | Environmetal | 2017 | Clone 2287  | <i>erm</i> (46)                      | WVAW00000000 | [33] |
| ENV_mdr_130 | Environmetal | 2017 | Clone 2287  | <i>erm</i> (46)                      | WVAU00000000 | [33] |
| ENV_mdr_133 | Environmetal | 2017 | Clone 2287  | <i>erm</i> (46)                      | WVAS00000000 | [33] |
| ENV_mls_3   | Environmetal | 2017 | Singleton   | <i>erm</i> (46)                      | WVAM00000000 | [33] |
| ENV_s_7     | Environmetal | 2017 | Singleton   | <i>erm</i> (46)                      | WVDW00000000 | [33] |
| ENV_s_19    | Environmetal | 2017 | Singleton   | <i>erm</i> (46)                      | WVAH00000000 | [33] |
| ENV_mdr_59  | Environmetal | 2017 | Singleton   | <i>erm</i> (46)                      | WVCI00000000 | [33] |
| ENV_s_84    | Environmetal | 2017 | Singleton   | <i>erm</i> (46)                      | WUZL00000000 | [33] |
| ENV_mdr_95  | Environmetal | 2017 | Singleton   | <i>erm</i> (46)                      | WVBM00000000 | [33] |
| ENV_s_60    | Environmetal | 2017 | Singleton   | <i>erm</i> (46) &<br><i>erm</i> (51) | WVDS00000000 | [33] |
| ENV_s_90    | Environmetal | 2017 | Singleton   | <i>erm</i> (46) &<br><i>erm</i> (51) | WUZJ00000000 | [33] |
| ENV_s_105   | Environmetal | 2017 | Singleton   | <i>erm</i> (46) &<br><i>erm</i> (51) | WVDO00000000 | [33] |
| ENV_mls_5   | Environmetal | 2017 | Singleton   | <i>erm</i> (51)                      | WVAL00000000 | [33] |
| ENV_mdr_134 | Environmetal | 2017 | Singleton   | <i>erm</i> (51)                      | WVAR00000000 | [33] |
| ENV_mdr_2   | Environmetal | 2017 | Clone G2017 | <i>erm</i> (51)                      | WVDJ00000000 | [33] |
| ENV_mdr_6   | Environmetal | 2017 | Clone G2017 | <i>erm</i> (51)                      | WVDH00000000 | [33] |
| ENV_s_15    | Environmetal | 2017 | Clone G2017 | <i>erm</i> (51)                      | WVAJ00000000 | [33] |
| ENV_mdr_34  | Environmetal | 2017 | Clone G2017 | <i>erm</i> (51)                      | WVCV00000000 | [33] |
| ENV_s_45    | Environmetal | 2017 | Clone G2017 | <i>erm</i> (51)                      | WUZV00000000 | [33] |
| ENV_mdr_46  | Environmetal | 2017 | Clone G2017 | <i>erm</i> (51)                      | WVEH00000000 | [33] |
| ENV_mdr_47  | Environmetal | 2017 | Clone G2017 | <i>erm</i> (51)                      | WVCQ00000000 | [33] |
| ENV_mdr_49  | Environmetal | 2017 | Clone G2017 | <i>erm</i> (51)                      | WVCP00000000 | [33] |
| ENV_mdr_50  | Environmetal | 2017 | Clone G2017 | <i>erm</i> (51)                      | WVCO00000000 | [33] |
| ENV_s_51    | Environmetal | 2017 | Clone G2017 | <i>erm</i> (51)                      | WUZU00000000 | [33] |
| ENV_mdr_53  | Environmetal | 2017 | Clone G2017 | <i>erm</i> (51)                      | WVCM00000000 | [33] |
| ENV_mdr_56  | Environmetal | 2017 | Clone G2017 | <i>erm</i> (51)                      | WVCK00000000 | [33] |
| ENV_mdr_62  | Environmetal | 2017 | Clone G2017 | <i>erm</i> (51)                      | WVCG00000000 | [33] |
| ENV_mdr_65  | Environmetal | 2017 | Clone G2017 | <i>erm</i> (51)                      | WVCE00000000 | [33] |
| ENV_mdr_68  | Environmetal | 2017 | Clone G2017 | <i>erm</i> (51)                      | WVCC00000000 | [33] |
| ENV_mdr_71  | Environmetal | 2017 | Clone G2017 | <i>erm</i> (51)                      | WVCB00000000 | [33] |
| ENV_mdr_74  | Environmetal | 2017 | Clone G2017 | <i>erm</i> (51)                      | WVEF00000000 | [33] |
| ENV_mdr_77  | Environmetal | 2017 | Clone G2017 | <i>erm</i> (51)                      | WVBY00000000 | [33] |
| ENV_mdr_80  | Environmetal | 2017 | Clone G2017 | <i>erm</i> (51)                      | WVBW00000000 | [33] |
| ENV_mdr_83  | Environmetal | 2017 | Clone G2017 | <i>erm</i> (51)                      | WVBU00000000 | [33] |
| ENV_mdr_86  | Environmetal | 2017 | Clone G2017 | <i>erm</i> (51)                      | WVBS00000000 | [33] |

|              |              |      |             |                 |               |      |
|--------------|--------------|------|-------------|-----------------|---------------|------|
| ENV_mdr_89   | Environmetal | 2017 | Clone G2017 | <i>erm</i> (51) | WVBQ00000000  | [33] |
| ENV_mdr_92   | Environmetal | 2017 | Clone G2017 | <i>erm</i> (51) | WVBO00000000  | [33] |
| ENV_mdr_98   | Environmetal | 2017 | Clone G2017 | <i>erm</i> (51) | WVBL00000000  | [33] |
| ENV_mdr_101  | Environmetal | 2017 | Clone G2017 | <i>erm</i> (51) | WVEC00000000  | [33] |
| ENV_mdr_104  | Environmetal | 2017 | Clone G2017 | <i>erm</i> (51) | WVBJ00000000  | [33] |
| ENV_mdr_107  | Environmetal | 2017 | Clone G2017 | <i>erm</i> (51) | WVBH00000000  | [33] |
| ENV_mdr_110  | Environmetal | 2017 | Clone G2017 | <i>erm</i> (51) | WVBF00000000  | [33] |
| ENV_mdr_113  | Environmetal | 2017 | Clone G2017 | <i>erm</i> (51) | WVEB00000000  | [33] |
| ENV_mdr_116  | Environmetal | 2017 | Clone G2017 | <i>erm</i> (51) | WVBC00000000  | [33] |
| ENV_mdr_119  | Environmetal | 2017 | Clone G2017 | <i>erm</i> (51) | WVEA00000000  | [33] |
| ENV_mdr_122  | Environmetal | 2017 | Clone G2017 | <i>erm</i> (51) | WVAZ00000000  | [33] |
| ENV_mdr_125  | Environmetal | 2017 | Clone G2017 | <i>erm</i> (51) | WVAX00000000  | [33] |
| ENV_mdr_128  | Environmetal | 2017 | Clone G2017 | <i>erm</i> (51) | WVAV00000000  | [33] |
| ENV_mdr_131  | Environmetal | 2017 | Clone G2017 | <i>erm</i> (51) | WVAT00000000  | [33] |
| ENV_mdr_137  | Environmetal | 2017 | Clone G2017 | <i>erm</i> (51) | WVDZ00000000  | [33] |
| ENV_mdr_140  | Environmetal | 2017 | Clone G2017 | <i>erm</i> (51) | WVAO00000000  | [33] |
| ENV_mdr_142  | Environmetal | 2017 | Clone G2017 | <i>erm</i> (51) | WVAN00000000  | [33] |
| ENV_s_4      | Environmetal | 2017 | Singleton   | Susceptible     | WVAK00000000  | [33] |
| ENV_s_13     | Environmetal | 2017 | Singleton   | Susceptible     | WVDU00000000  | [33] |
| ENV_s_25     | Environmetal | 2017 | Singleton   | Susceptible     | WVAE00000000  | [33] |
| ENV_s_27     | Environmetal | 2017 | Singleton   | Susceptible     | WVAD00000000  | [33] |
| ENV_s_29     | Environmetal | 2017 | Singleton   | Susceptible     | WVAC00000000  | [33] |
| ENV_s_31     | Environmetal | 2017 | Singleton   | Susceptible     | WVAB00000000  | [33] |
| ENV_s_33     | Environmetal | 2017 | Singleton   | Susceptible     | WVAA00000000  | [33] |
| ENV_s_39     | Environmetal | 2017 | Singleton   | Susceptible     | WUZX00000000  | [33] |
| ENV_s_42     | Environmetal | 2017 | Singleton   | Susceptible     | WUZW00000000  | [33] |
| ENV_s_48     | Environmetal | 2017 | Singleton   | Susceptible     | WVDT00000000  | [33] |
| ENV_s_57     | Environmetal | 2017 | Singleton   | Susceptible     | WUZS00000000  | [33] |
| ENV_s_63     | Environmetal | 2017 | Singleton   | Susceptible     | WUZR00000000  | [33] |
| ENV_s_65     | Environmetal | 2017 | Singleton   | Susceptible     | WUZQ00000000  | [33] |
| ENV_s_69     | Environmetal | 2017 | Singleton   | Susceptible     | WUZP00000000  | [33] |
| ENV_s_72     | Environmetal | 2017 | Singleton   | Susceptible     | WUZO00000000  | [33] |
| ENV_s_75     | Environmetal | 2017 | Singleton   | Susceptible     | WVDR00000000  | [33] |
| ENV_mdr_87_2 | Environmetal | 2017 | Singleton   | Susceptible     | WUZK00000000  | [33] |
| ENV_s_96     | Environmetal | 2017 | Singleton   | Susceptible     | WUZI00000000  | [33] |
| ENV_s_108    | Environmetal | 2017 | Singleton   | Susceptible     | WUZG00000000  | [33] |
| ENV_s_111    | Environmetal | 2017 | Singleton   | Susceptible     | WVDN00000000  | [33] |
| ENV_s_117    | Environmetal | 2017 | Singleton   | Susceptible     | WUZE00000000  | [33] |
| ENV_s_120    | Environmetal | 2017 | Singleton   | Susceptible     | WUZD00000000  | [33] |
| ENV_s_123    | Environmetal | 2017 | Singleton   | Susceptible     | WVDM00000000  | [33] |
| ENV_s_126    | Environmetal | 2017 | Singleton   | Susceptible     | WUZC00000000  | [33] |
| ENV_s_132    | Environmetal | 2017 | Singleton   | Susceptible     | WUZB00000000  | [33] |
| ENV_s_135    | Environmetal | 2017 | Singleton   | Susceptible     | WUZA00000000  | [33] |
| ENV_mdr_136  | Environmetal | 2017 | Singleton   | Susceptible     | WVAQ00000000  | [33] |
| ENV_s_138    | Environmetal | 2017 | Singleton   | Susceptible     | WVDK00000000  | [33] |
| ENV_s_141    | Environmetal | 2017 | Singleton   | Susceptible     | WUYZ00000000  | [33] |
| ENV_s_144    | Environmetal | 2017 | Singleton   | Susceptible     | WUY Y00000000 | [33] |
